# Supplementary material for: Photosensitized addition of isopropanol to furanones in a 365 nm UV-LED microchip
Source: Royal Society of Chemistry journal article supplement (doi:10.1039/c0pp00223b), 2010-10-08

## Electronic Supplementary Information

### Photosensitized addition of isopropanol to furanones in a 365 nm UV-LED microchip

Oksana Shvydkiv,<sup>a</sup> Alexander Yavorsky,<sup>a</sup> Kieran Nolan,<sup>a</sup> Ali Youssef,<sup>b</sup> Emmanuel Riguet,<sup>b</sup> Norbert Hoffmann<sup>b</sup> and Michael Oelgemöller<sup>\*,c</sup>

<sup>a</sup> School of Chemical Sciences, Dublin City University, Dublin 9, Ireland.

<sup>b</sup> Institut de Chimie Moléculaire de Reims, UMR 6229 CNRS et Université de Reims Champagne-Ardenne, Equipe de Photochimie, UFR Sciences, B.P. 1039, 51687, Reims, Cedex 02, France. Fax: +33 (0)3 26 91 31 66; Tel: +33 (0)3 26 91 33 10; E-mail: [norbert.hoffmann@univ-reims.fr](mailto:norbert.hoffmann@univ-reims.fr)

<sup>c</sup> School of Pharmacy and Molecular Sciences, James Cook University, Townsville, Qld 4811, Australia. Fax: +61 (0)7 4781 6078; Tel: +61 (0)7 4781 4543; E-mail: [michael.oelgemoeller@jcu.edu.au](mailto:michael.oelgemoeller@jcu.edu.au)

### Comparison of UV-spectrum of DMBP with emission spectrum of UVA (RPR-3500Å) lamp:

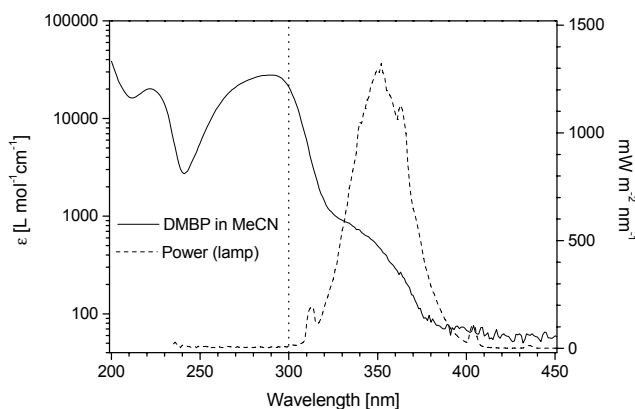

### Light-penetration profile for Pyrex test tube:

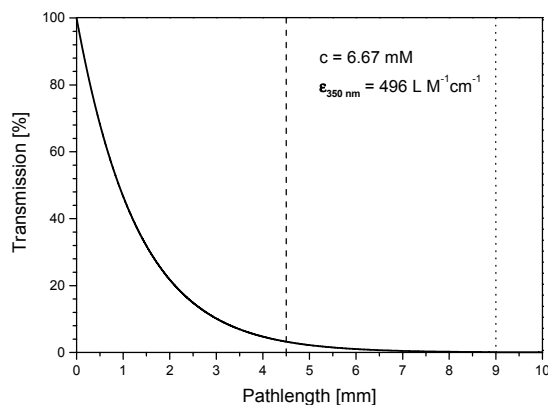

The vertical lines represent the effective pathlength (4.5 mm; dashed) and the inner diameter of Pyrex test tube (9 mm; dotted).

**General procedure for irradiation in the LED-microchip:**

A solution of the furanone (0.1 mmol) and DMBP (0.02 mmol) in isopropanol (3 mL) was purged with argon and loaded into a syringe pump. The reaction mixture was pumped through a microchip (Micronit Microfluidics FC\_R150.676.2; channel width 150  $\mu\text{m}$ , depth 150  $\mu\text{m}$ , internal volume 13  $\mu\text{l}$ ) while irradiated by  $6 \times 365$  nm high power LEDs (Seoul Optodevice, P8D236,  $6 \times 75$  mW). After evaporation of the solvent, the conversion rate was determined by  $^1\text{H-NMR}$  spectroscopy of the crude product. The signal integration for proton in the  $\beta$ -position of **1a-c** was compared to the signal integration for the acetal proton of **2a-c**.

**General procedure for irradiation under batch conditions:**

A solution of the furanone (0.5 mmol) and DMBP (0.1 mmol) in isopropanol (15 mL) was filled in a Pyrex glass tube (inner diameter: 9 mm) and purged with argon. The tube was stoppered and the reaction mixture was irradiated for 5 minutes at  $350 \pm 25$  nm (Rayonet RPR-100, equipped with  $16 \times \text{RPR-3500}\text{\AA}$  lamps). After evaporation of the solvent, the conversion rate was determined by  $^1\text{H-NMR}$  spectroscopy of the crude product (see above). For characterization purposes, products were isolated and purified by column chromatography with silica gel.

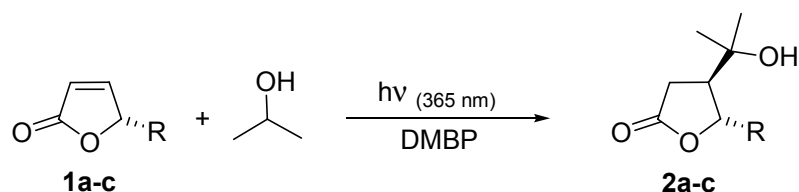

All compounds (**2a-c**) are literature known and have been fully characterized earlier:

**2a**: K. Ohga and T. Matsuo, *J. Org. Chem.*, 1974, **39**, 106.

**2b** and **2c**: N. Hoffmann, *Tetrahedron: Asym.*, 1994, **5**, 879.

**2a:** R=H (yellow liquid).

Eluent: ethyl acetate/petroleum ether: 2.5/7.5

$^1\text{H}$  NMR (250 MHz,  $\text{CDCl}_3$ ):  $\delta$ =4.29 (dd,  $J$ =12.4, 8.2Hz, 1H), 4.25 (dd,  $J$ =9.2, 10.8Hz, 1H), 2.34-2.62 (m, 4H), 1.14 (s, 6H) ppm.

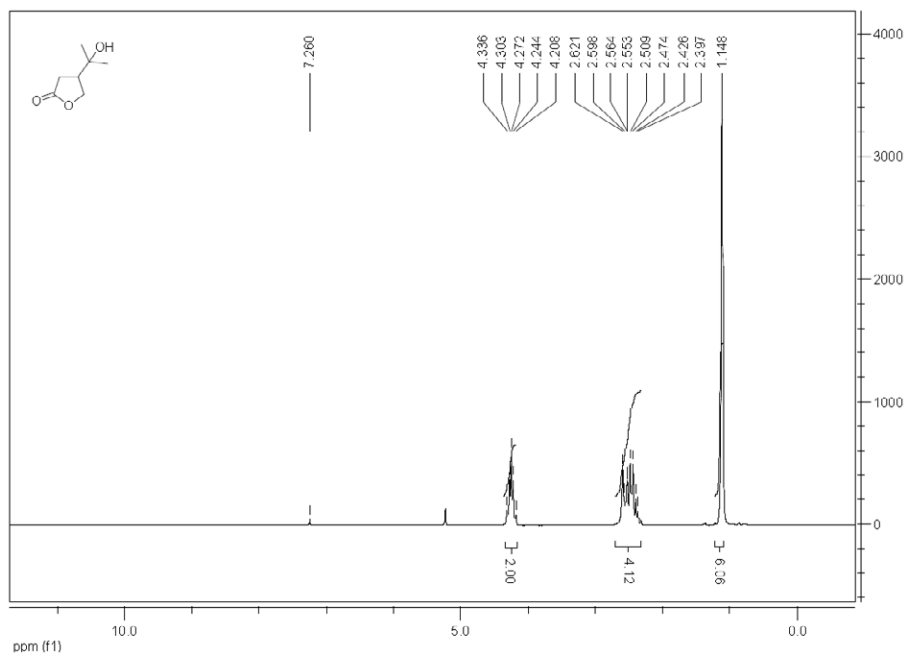

$^{13}\text{C}$  NMR (62 MHz,  $\text{CDCl}_3$ ):  $\delta$ =178.11, 69.51, 69.51, 45.69, 29.74, 27.87, 27.48 ppm.

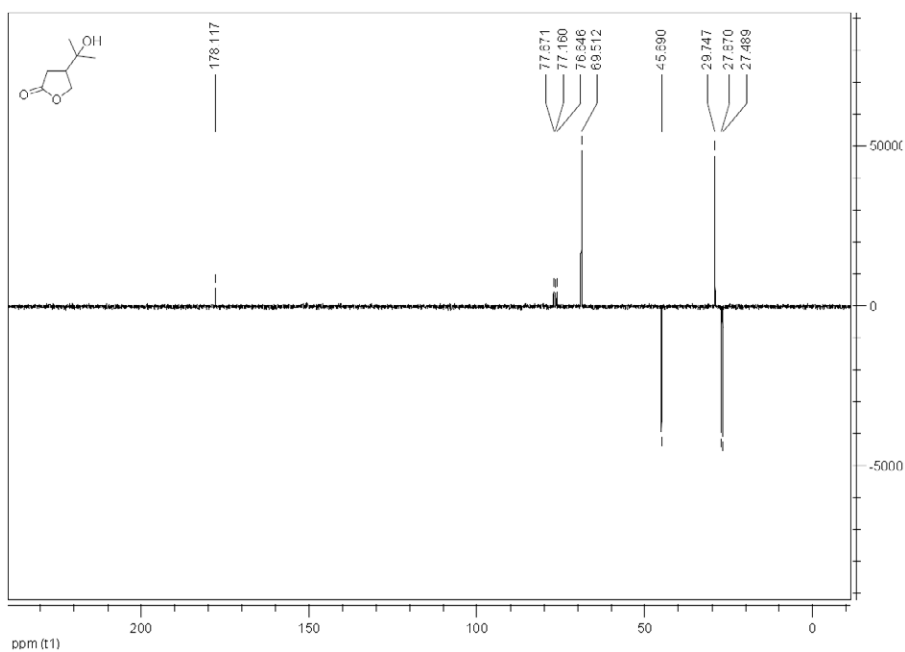

IR (film):  $\nu$ =3455, 2975, 2932, 1772, 1372, 1182, 1022  $\text{cm}^{-1}$ .

**2b**: R = OEt (yellow liquid).

Eluent: ethyl acetate/petroleum ether: 7/3.

$^1\text{H}$  NMR (250 MHz,  $\text{CDCl}_3$ ):  $\delta$ =5.46 (d,  $J$ =3.3Hz 1H), 3.82 (dq,  $J$ =10.6, 7.1Hz, 1H), 3.66 (dq,  $J$ =11.0, 7.1Hz, 1H), 2.63 (dd,  $J$ =18.1, 9.8Hz, 1H), 2.50 (dd,  $J$ =18.1, 6.1Hz, 1H), 2.20 (m, 1H), 1.22 (s, 3H), 1.19 (t,  $J$ =7.0Hz, 3H), 1.15 (s, 3H) ppm.

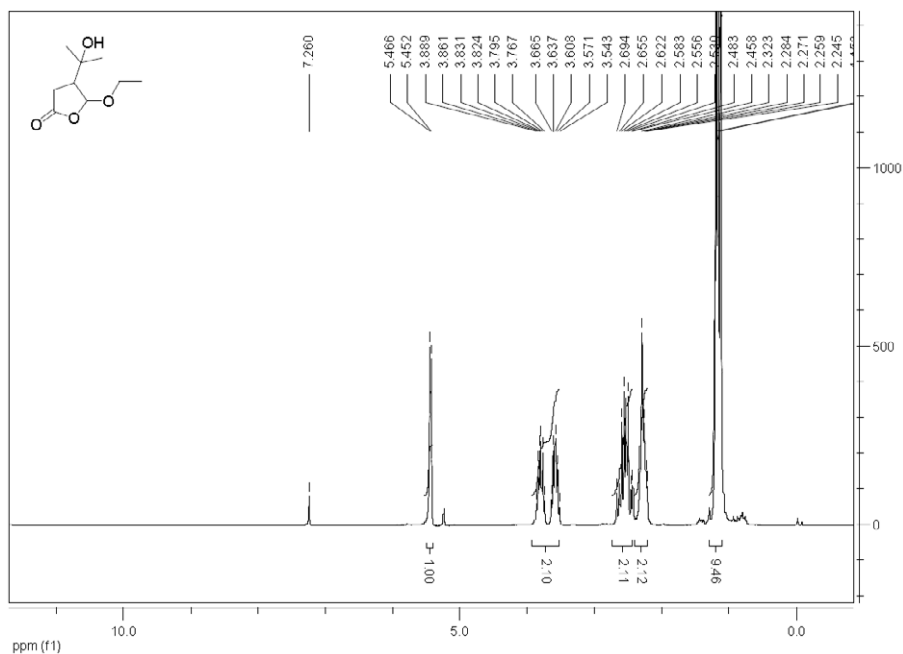

$^{13}\text{C}$  NMR (62 MHz,  $\text{CDCl}_3$ ):  $\delta$ =176.33, 105.93, 69.71, 65.69, 51.86, 30.01, 27.84, 27.84, 15.04 ppm.

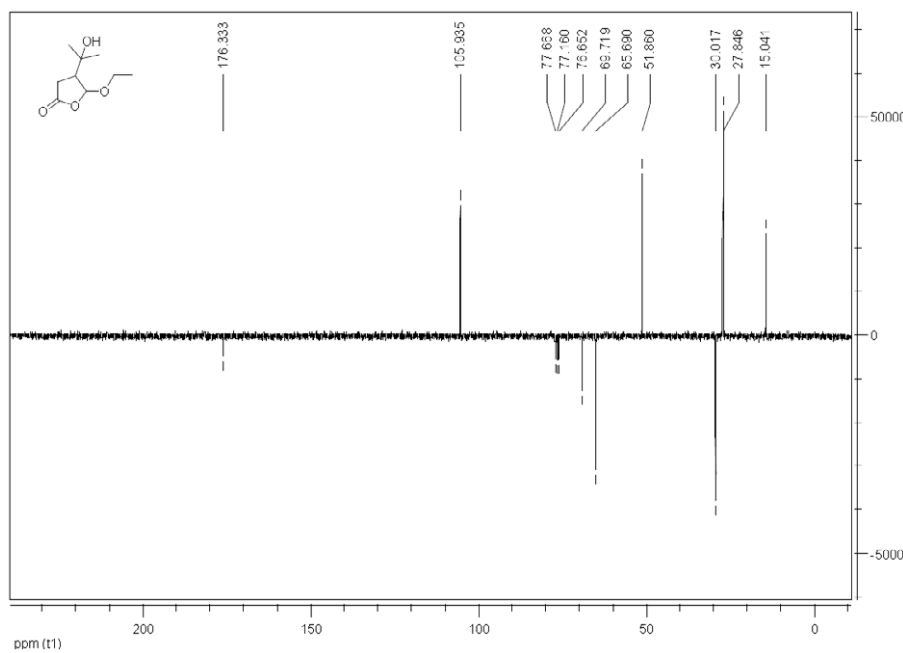

**2c:** R = Omenth (colorless crystals).

Eluent: ethyl acetate/petroleum ether: 1.5/8.5.

$^1\text{H}$  NMR (250 MHz,  $\text{CDCl}_3$ ):  $\delta$ =5.65 (d,  $J$ =2.8Hz, 1H), 3.48 (dt,  $J$ =10.5, 3.9Hz, 1H), 2.64(dd,  $J$ =18.1, 6.1Hz, 1H), 2.49 (dd,  $J$ =18.1, 5.9Hz), 2.23-2.32 (m, 2H), 1.99-2.14 (m, 2H), 1.57-1.62 (m, 2H), 1.22 (s, 3H), 1.15 (s, 3H), 0.88 (d,  $J$ =6Hz, 3H), 0.83 (d,  $J$ =6.8Hz, 3H), 0.72 (d,  $J$ =6.8Hz, 3H) ppm.

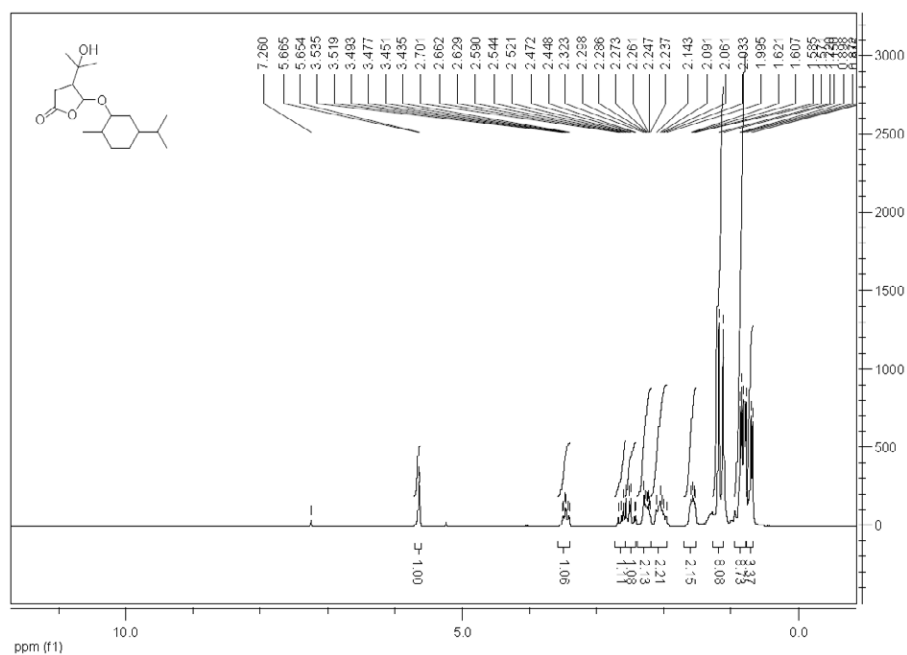

$^{13}\text{C}$  NMR (62 MHz,  $\text{CDCl}_3$ ):  $\delta$ =176.48, 102.32, 77.32, 69.92, 51.82, 47.81, 39.82, 34.32, 31.39, 30.15, 27.80, 27.77, 25.38, 23.08, 22.30, 20.94, 15.69 ppm.

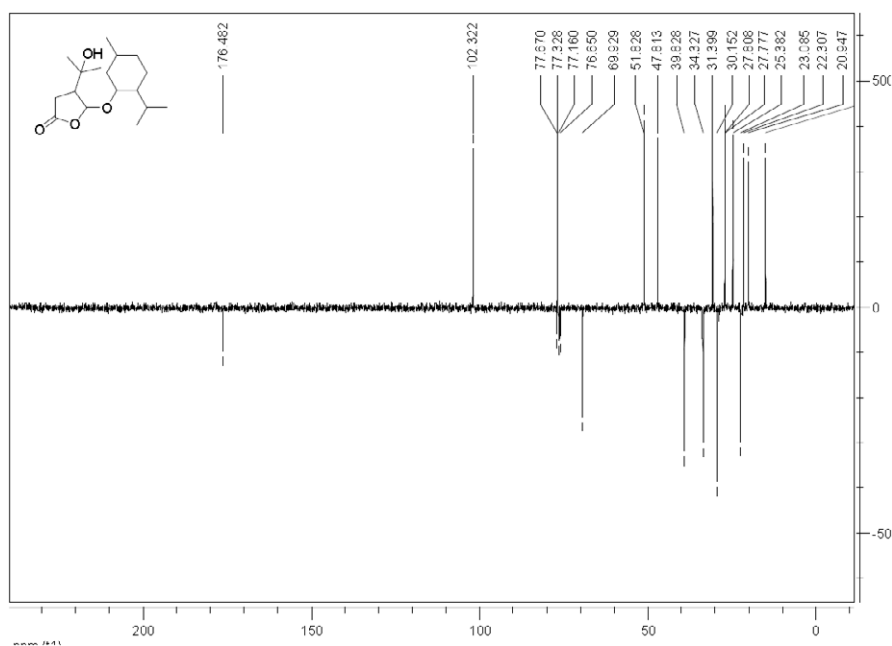

Supplement: c0pp00223b.pdf [file c0pp00223b.pdf]
